# Supplementary material
Source: HighWire-hosted journal article supplement (https://www.jneurosci.org/highwire/filestream/601591/field_highwire_adjunct_files/0/Supplemental_Material.pdf)
Supplement: Supplemental_Material.pdf [file Supplemental_Material.pdf]

## Supplementary Figures

**Supplementary Figure 1.** Distribution of  $\beta\text{Gal}^+\text{BrdU}^+\text{GABA}^-$  neurons in the cerebral cortex and confirmation of the glutamatergic neuronal fate of most *Dbx1*-derived cells in the CP of P0 *Dbx1<sup>CRE</sup>;Tau<sup>GFPiresLacZ</sup>* animals. **A-D**, Nissl staining on P0 coronal sections shows that layer V corresponds to bins 5 to 7 (red boxes in **B,D**) when dividing the dorsolateral cortex into 10 bins at both rostral (**A,B**) and caudal (**C,D**) levels (see Materials and Methods). **E**, Graph shows the distribution of  $\beta\text{Gal}^+\text{BrdU}^+\text{GABA}^-$  neurons (expressed as the percentage of total  $\beta\text{Gal}^+\text{GABA}^-$  cells) into 10 bins from the MZ (left) to the SP (right) depending on the stage of BrdU injection (E10.5, E11.5, E12.5, E14.5 and E16.5; means of 3 sections per embryo  $\pm$  s.e.m, at dorsolateral levels). The dashed red box shows the position of layer V. **F,F'**, Immunohistochemistry for NeuN and Olig2 on P0 *Dbx1<sup>CRE</sup>;Tau<sup>GFPiresLacZ</sup>* animals shows that almost all  $\beta\text{Gal}^+$  neurons express NeuN (white arrowheads) and none express Olig2, confirming their neuronal identity. **G-G''**, Triple immunostaining for  $\beta\text{Gal}$ , GABA and glutamate was used to control that the glutamate immunostaining does not label *Dbx1*-derived GABAergic cells (black arrowheads) whereas the  $\beta\text{Gal}^+\text{GABA}^-$  neurons are  $\text{Glu}^+$  (white arrowheads). Scale bars: **A,C**, 500 $\mu\text{m}$ ; **B,D**, 100 $\mu\text{m}$ ; **F**, 20 $\mu\text{m}$ ; **G**, 10 $\mu\text{m}$ .

**Supplementary Figure 2.** Migration of glutamatergic *Dbx1*-derived neurons into the dorsolateral pallium of *Dbx1<sup>CRE</sup>;Tau<sup>GFPiresLacZ</sup>* and *Dbx1<sup>CRE</sup>;ROSA26<sup>YFP</sup>* embryos. **A,B**, *Dbx1*-derived neurons are observed in the pallium of *Dbx1<sup>CRE</sup>;Tau<sup>GFPiresLacZ</sup>* embryos on E13.5 coronal sections stained using XGal reaction and GFP immunohistochemistry, migrating tangentially either through the IZ (black arrowhead in **B**) or through the MZ and SP. Some radially migrating *Dbx1*-derived neurons are also observed in the developing CP (white arrowhead in **B**). **C-D'**, Immunostaining for YFP (**C-D**) and Tbr1 (**C-D'**) on coronal sections of E14.5 *Dbx1<sup>CRE</sup>;ROSA26<sup>YFP</sup>* embryos labels *Dbx1*-derived glutamatergic neurons (white arrowheads in **D,D'**) and shows their migration through the IZ, similar to the interneuron migration (black arrowheads) also described in Figure 4. Some  $\text{YFP}^+\text{Tbr1}^+$  neurons are observed invading the CP by radial migration (**C',D**). Scale bars: **A**, 100 $\mu\text{m}$ ; **B,C**, 50 $\mu\text{m}$ ; **D**, 20 $\mu\text{m}$ .

**Supplementary Figure 3.** Evaluation of cell density and confirmation of the kinetic of *Dbx1*-derived cells loss using *Dbx1<sup>CRE</sup>;ROSA26<sup>YFP</sup>* animals. **A-D**, Cell density in the CP at E16.5, E18.5 (**A**), P0 (**B**), P2 and in layers II-VI in adults (**C**) evaluated by counting DAPI staining in 12-18 representative boxes of 100 $\mu\text{m}^2$  picked randomly from 5 slices of 35 $\mu\text{m}$  thickness. The progressive decrease in cell density with time was observed on confocal images of DAPI staining (**A-C**) and quantified in the graph as DAPI<sup>+</sup> nuclei/mm<sup>2</sup> (**D**). **E-H**, Immunohistochemistry for YFP on coronal sections of P0 (**E,F**) and adult (**G,H**) *Dbx1<sup>CRE</sup>;ROSA26<sup>YFP</sup>* animals. **F,H**, High magnifications of boxed areas in (**E**) and (**G**), respectively. **I**, Graph shows the proportion of YFP<sup>+</sup> cells relative to DAPI<sup>+</sup> nuclei. Despite a large proportion of *Dbx1*-derived glial cells (35%, data not shown), the *ROSA26<sup>YFP</sup>* reporter line presents less than half of labeled cells compared with the *Tau<sup>GFPiresLacZ</sup>* reporter line, likely due to changes in recombination efficiencies. Moreover, cell loss starts at E18.5 in *Dbx1<sup>CRE</sup>;ROSA26<sup>YFP</sup>*, probably due to the death of *Dbx1*-derived glial cells. **J**, Coexpression of Olig2 (red) and YFP (green) shows that *Dbx1*-derived oligodendrocytes migrate in the IZ starting at E16.5. No oligodendrocytes are observed in the CP at this stage. **K**, High magnification of (**J**) showing YFP<sup>+</sup>Olig2<sup>+</sup> cells in the IZ of the dorsolateral cortex. Results are expressed as mean $\pm$ s.e.m. Scale bars: **E,G**, 500 $\mu\text{m}$ ; **F,H**, 300 $\mu\text{m}$ ; **J**, 50 $\mu\text{m}$ ; **K**, 20 $\mu\text{m}$ .

**Supplementary Figure 4.** Specific ablation of *Dbx1*-derived cells. **A-F**, TUNEL staining together with immunostaining for  $\beta\text{Gal}$  on E14.5 *Dbx1<sup>DTA</sup>;Dbx1<sup>nlsLacZ</sup>* control animals (**A**) or *E1-Ngn2/CRE;Dbx1<sup>DTA</sup>;Dbx1<sup>nlsLacZ</sup>* triple mutant animals (**B**) show that cell death is specifically located at the level of the PSB in mutant (**F**) and no cell death is observed in the dorsolateral cortex (**D**). Moreover no TUNEL staining is observed at the PSB (**E**) or in the dorsolateral pallium (**C**) of control animals. Higher detection in the green channel in (**B**) is due to residual live GFP from the *E1-Ngn2/CRE(iresGFP)* transgene. **G-J**, XGal staining on coronal sections of E14.5 *Dbx1<sup>DTA</sup>;Dbx1<sup>nlsLacZ</sup>* control (**G-H'**) and *E1-Ngn2/CRE;Dbx1<sup>DTA</sup>;Dbx1<sup>nlsLacZ</sup>* triple mutant (**I-J'**) animals labeling *Dbx1*-derived cells from the PSB. **G',H',I',J'**, High magnifications of boxed regions in **G,H,I** and **J** respectively. A specific decrease in XGal<sup>+</sup> cells is observed in the CP of mutant animals compared with controls in both rostradorsal (**G',I'**) and caudolateral (**H',J'**) regions. **K-N**, Graphs show the number of XGal<sup>+</sup> cells in both rostradorsal (**K**, E12.5:  $p=0.1296$ ,  $n=171$  in control and  $n=129$  in mutant; **M**, E14.5:  $p=0.0129$ ,  $n=151$  in control and  $n=90$  in

mutant) and caudolateral (*L*, E12.5:  $p=0.036$ ,  $n=650$  in control and  $n=461$  in mutant; *N*, E14.5:  $p=0.0237$ ,  $n=471$  in control and  $n=245$  in mutant) regions of E12.5 (*K,L*) and E14.5 (*M,N*) control and mutant developing cortices. \* $P<0.05$ , *t test*. Scale bars: *A,G,H,I,J*, 200 $\mu\text{m}$ ; *G',H',I',J'*, 50 $\mu\text{m}$ ; *C*, 40 $\mu\text{m}$ .

**Supplementary Figure 5.** Ablation does not affect the generation and migration of *Dbx1*-derived CR cells and interneurons or gene expression at the PSB. *A-D*, *In situ* hybridization for *Reln* on E11.5 control (*A,C*) and *E1-Ngn2/CRE;Dbx1<sup>DTA</sup>* (*B,D*) embryos at both rostral (*A,B*) and caudal (*C,D*) levels confirming the presence and normal distribution of CR neurons. *E-G*, Graphs show the number of *Reln*<sup>+</sup> cells in the dorsal/dorsolateral pallium (pink dashed boxes) of E11.5 (*E*) and E12.5 (*G*) embryos and in the medial pallium (blue dashed box) of E11.5 embryos (*F*) in both control (black bars) and mutant (green bars) telencephalons. No significant difference is observed in any regions at both stages. *H-O*, E12.5 coronal sections of control (*H,J,L,N*) and *E1-Ngn2/CRE;Dbx1<sup>DTA</sup>* (*I,K,M,O*) telencephalons were hybridized with *Ngn2* (*H,I*), *Dlx1* (*J,K*), *Wnt7b* (*L,M*) and *Sfrp2* (*N,O*) mRNA probes. No difference is observed between control and mutant animals for the expression of each of these genes. *P,Q*, Immunohistochemistry for Calbindin on E12.5 control (*P*) and mutant (*Q*) embryos shows no defect in interneuron generation and migration from subpallial sources into the cortex upon ablation. *R-U*, E14.5 coronal sections of control (*R,T*) and *E1-Ngn2/CRE;Dbx1<sup>DTA</sup>* (*S,U*) telencephalons were hybridized with *TGF $\alpha$*  (*R,S*) and *Sfrp2* (*T,U*) RNA probes. No difference is observed between control and mutant animals. Scale bars: *R-U*, 200 $\mu\text{m}$ ; *A, H-Q*, 100 $\mu\text{m}$ .

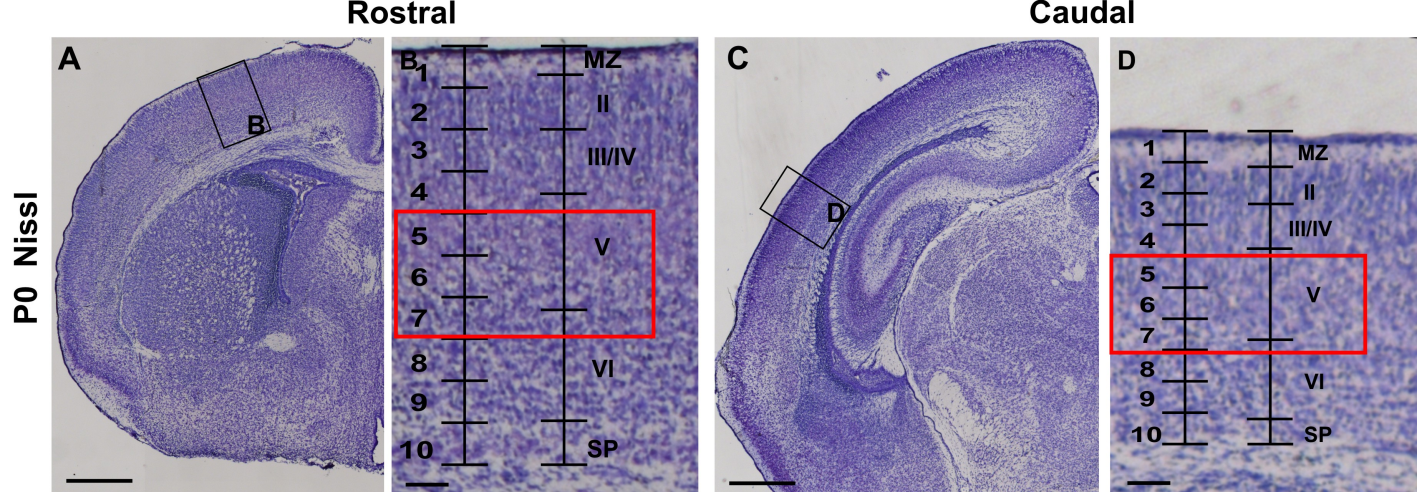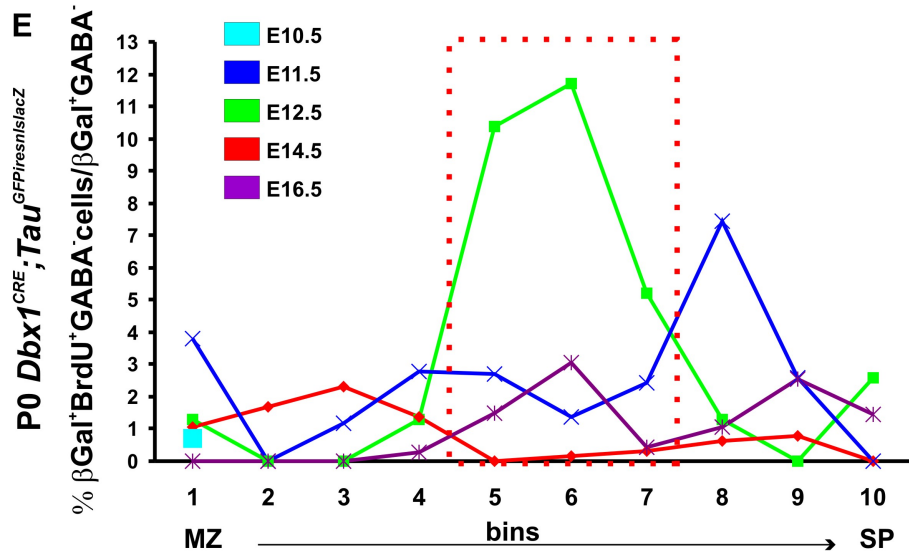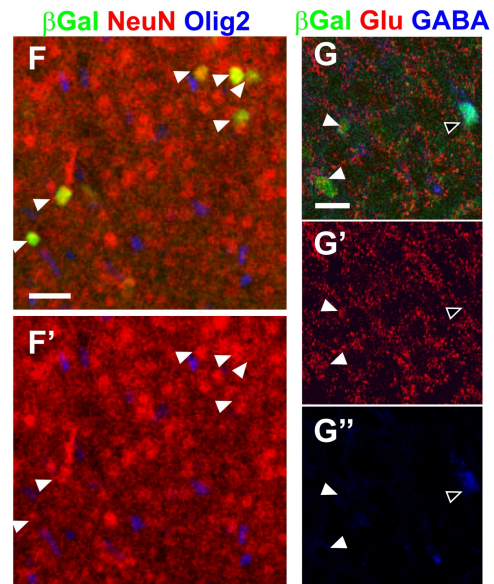

E13.5

XGal GFP

*GFPiresnlacZ*  
*Dbx1<sup>CRE</sup>;Tau*

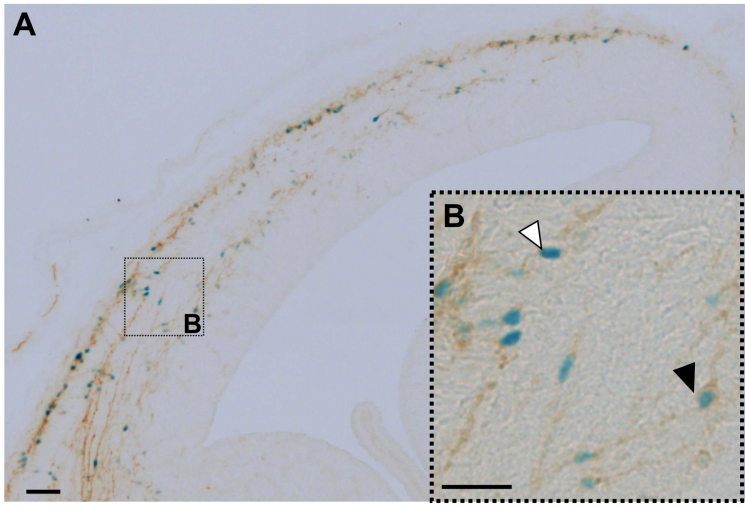

E14.5

YFP Tbr1

*YFP*  
*Dbx1<sup>CRE</sup>;ROSA*

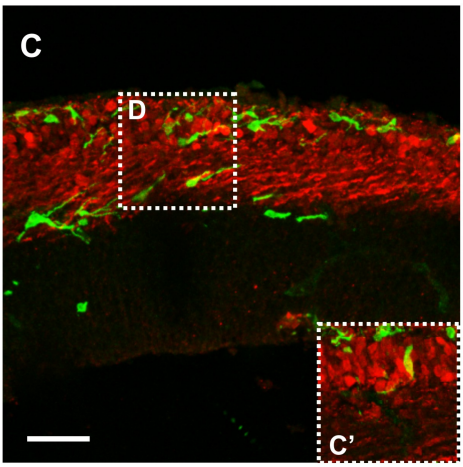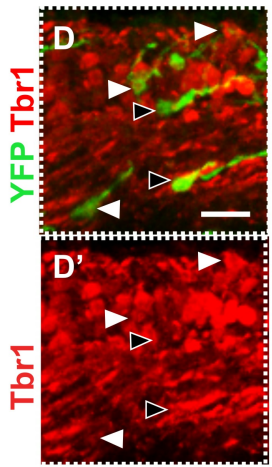

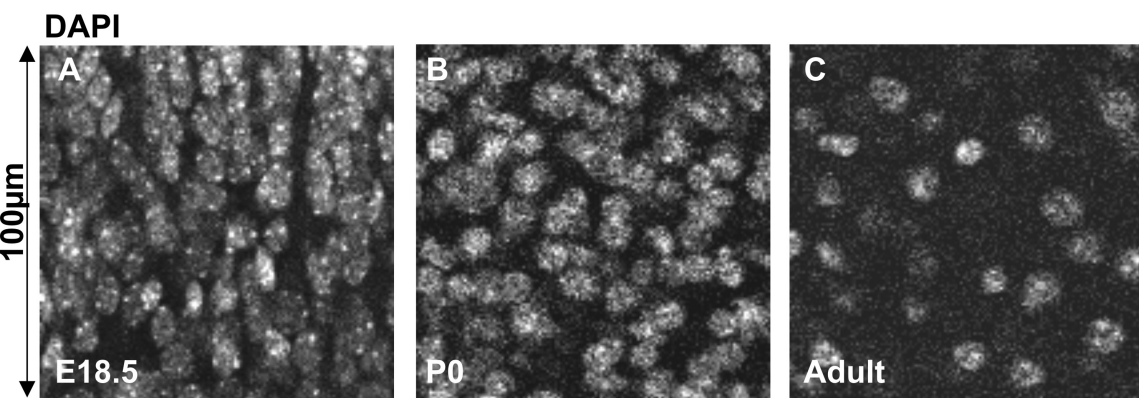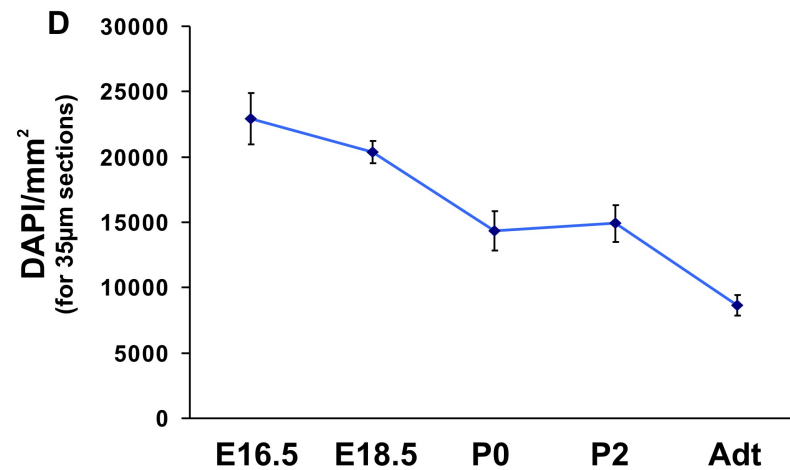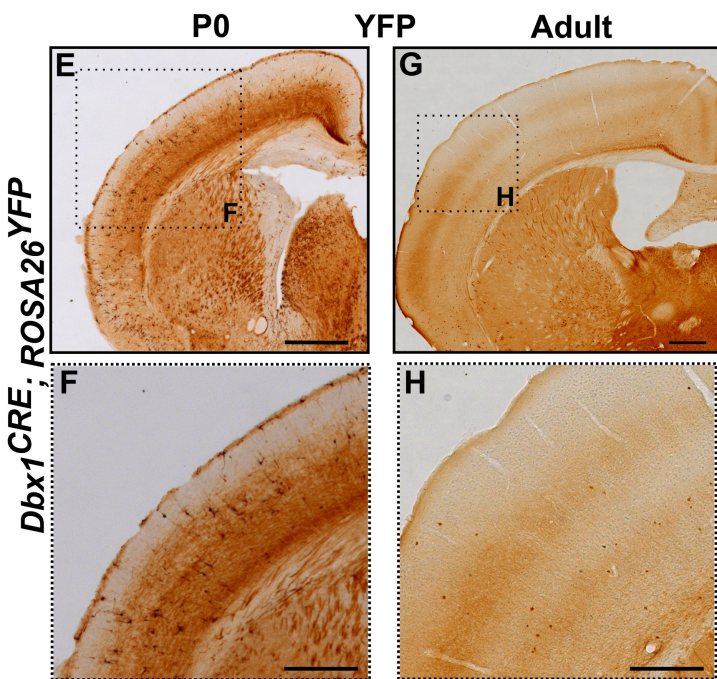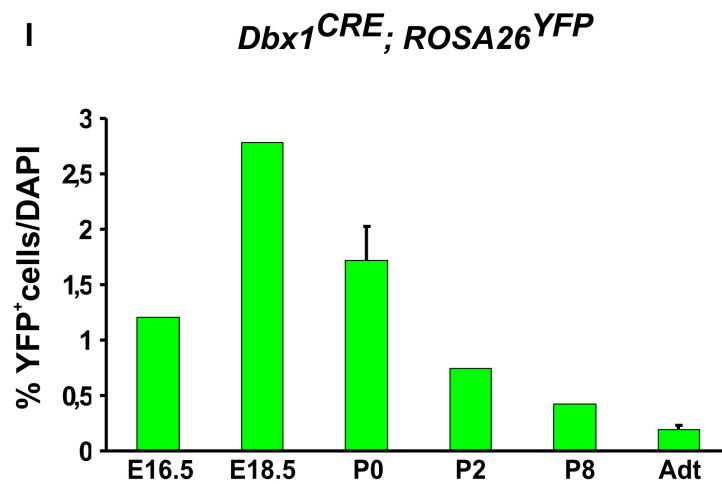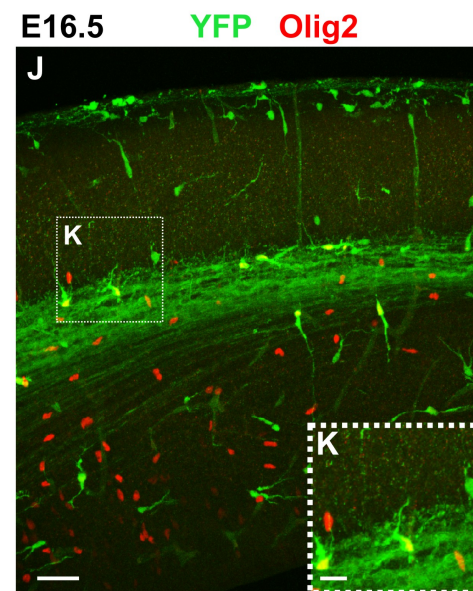

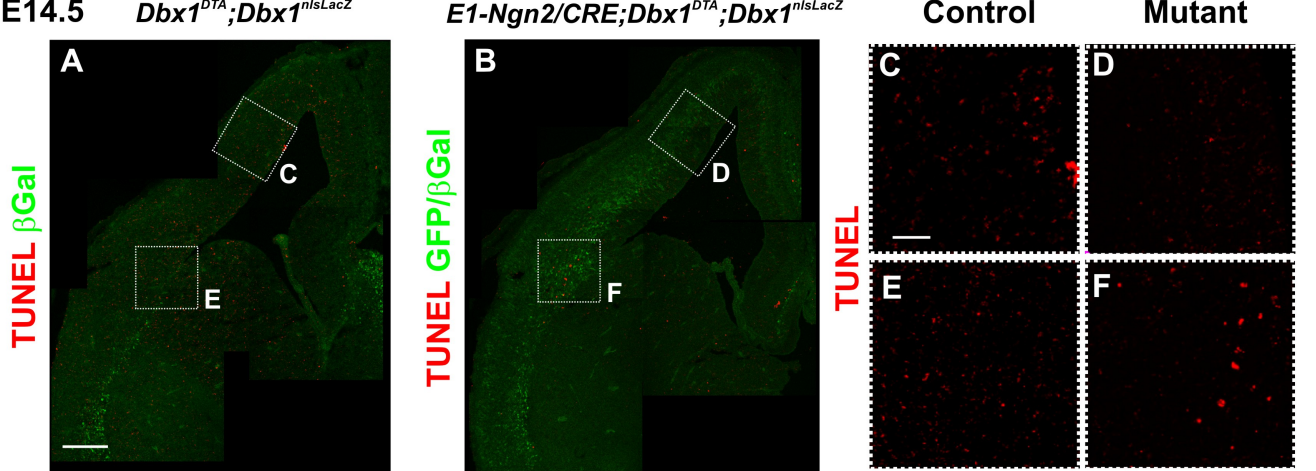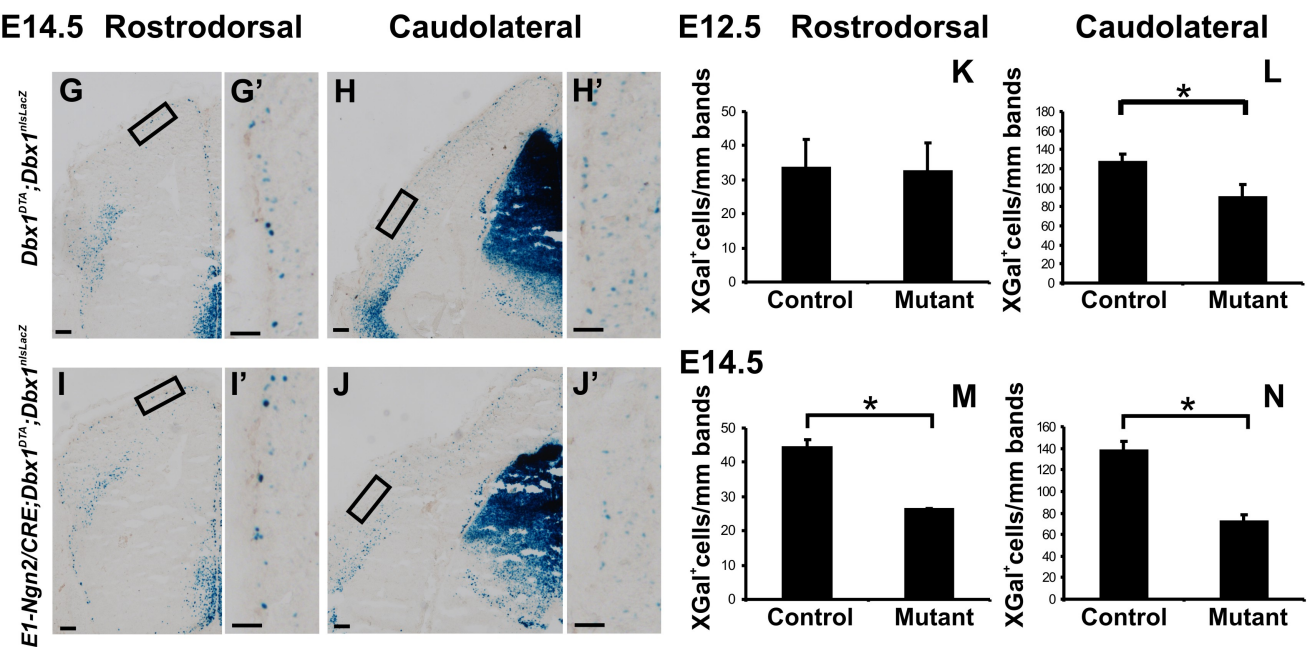

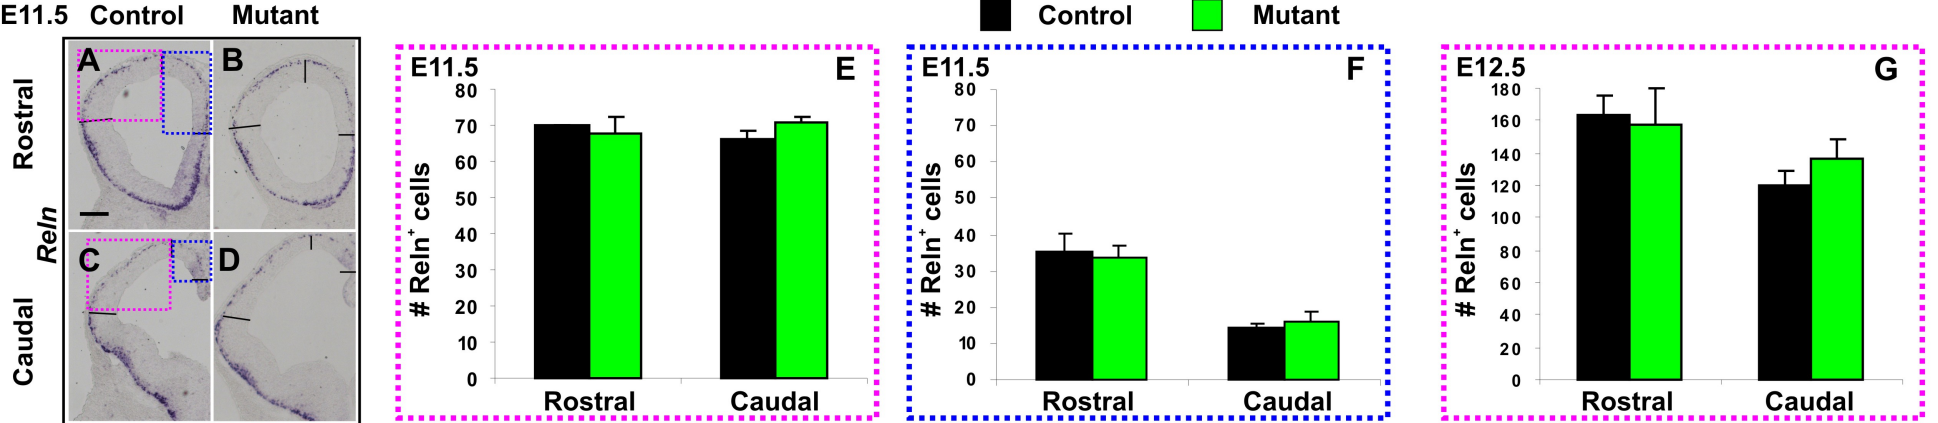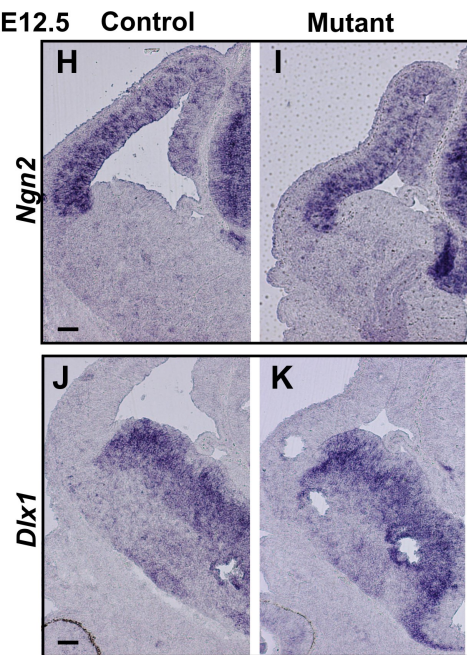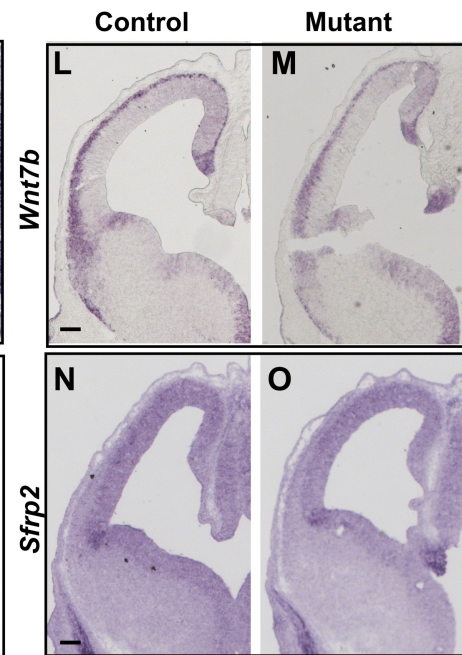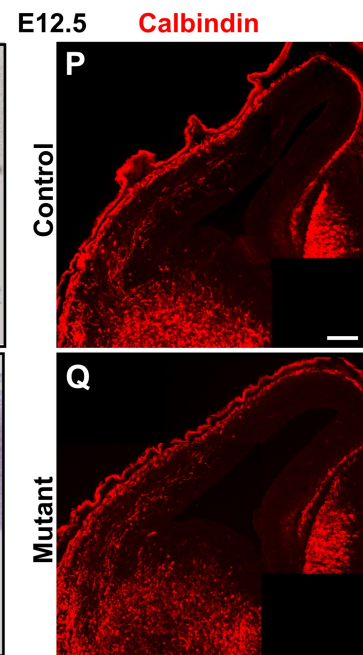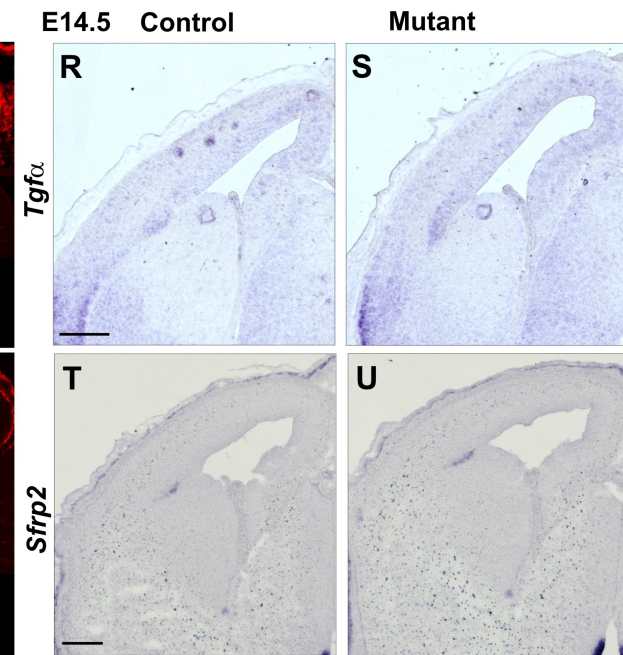



**Supplementary Table 1 : Values of  $\beta\text{Gal}^+\text{Tbr1}^+\text{Reln}^-$  cells per mm of CP**

| <b>E13.5</b> | <b>Medial</b> | <b>Dorsal</b> | <b>Dorsolateral</b> | <b>Lateral</b> |
|--------------|---------------|---------------|---------------------|----------------|
| c0           | 0.93±1.14     | 8.6±0.94      | 26.60±2.40          | 54.42±5.25     |
| c1           | 1.70±1.35     | 17.32±0.94    | 29.72±2.40          | 52.04±3.96     |
| c2           | 2.20±1.35     | 18.877±4.86   | 24.28±6.65          | 50.49±2.57     |
| c3           | 6.36±3.29     | 12.16±5.15    | 33.02±6.39          | 62.11±11.49    |
| <b>E14.5</b> | <b>Medial</b> | <b>Dorsal</b> | <b>Dorsolateral</b> | <b>Lateral</b> |
| c0           | 27.37±2.31    | 40.23±7.12    | 44.23±5.09          | 32.54±14.98    |
| c1           | 25.05±4.17    | 41.64±2.58    | 31.20±0.59          | 44.71±1.28     |
| c2           | 19.92±3.05    | 27.98         | 28.52±3.63          | 42.54±1.51     |
| c3           | 39.89±0.32    | 47.59         | 49.21±5.78          | 42.19±2.96     |

$\beta\text{Gal}^+\text{Tbr1}^+\text{Reln}^-$  neurons were counted on 4 coronal sections homogeneously distributed along the rostrocaudal axis and subdivided into 4 regions distributed along the mediolateral axis of the cortical plate of E13.5 ( $n=353$ ) and E14.5 ( $n=448$ ) on *Dbx1*<sup>CRE</sup>; *Tau*<sup>GFPireslacZ</sup> animals. The table recapitulates the mean±sem of the number of cells in the thickness of CP per mm which have been reported as grey values for the schematic representations (See Materials and Methods).
